# Supplementary material for: The N-terminus of apolipoprotein B mediates the interaction of atherogenic lipoproteins with endothelial cells
Source: JCI journal article supplement (doi:10.1172/jci190513), 2026-04-23

Figure 1B

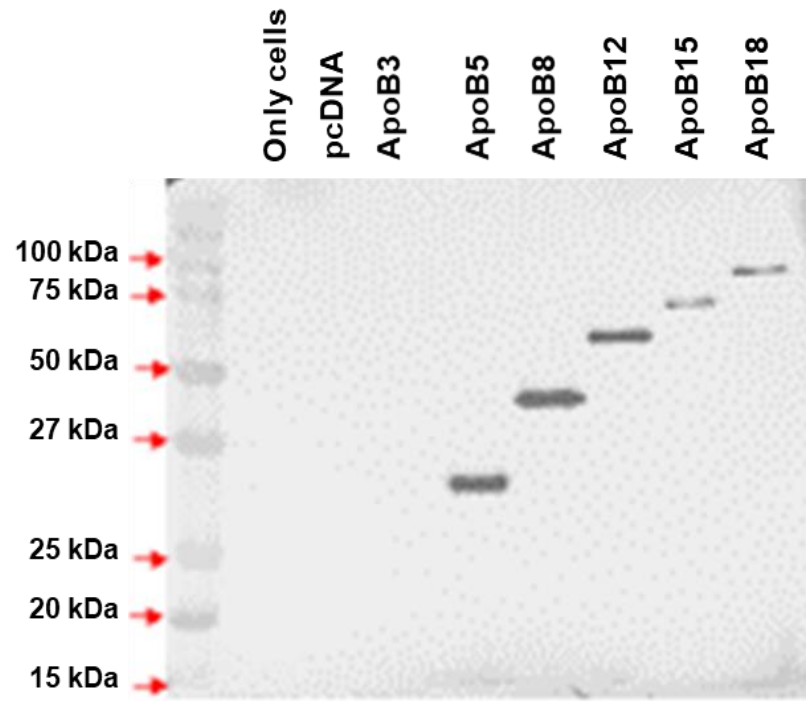

Figure 1G

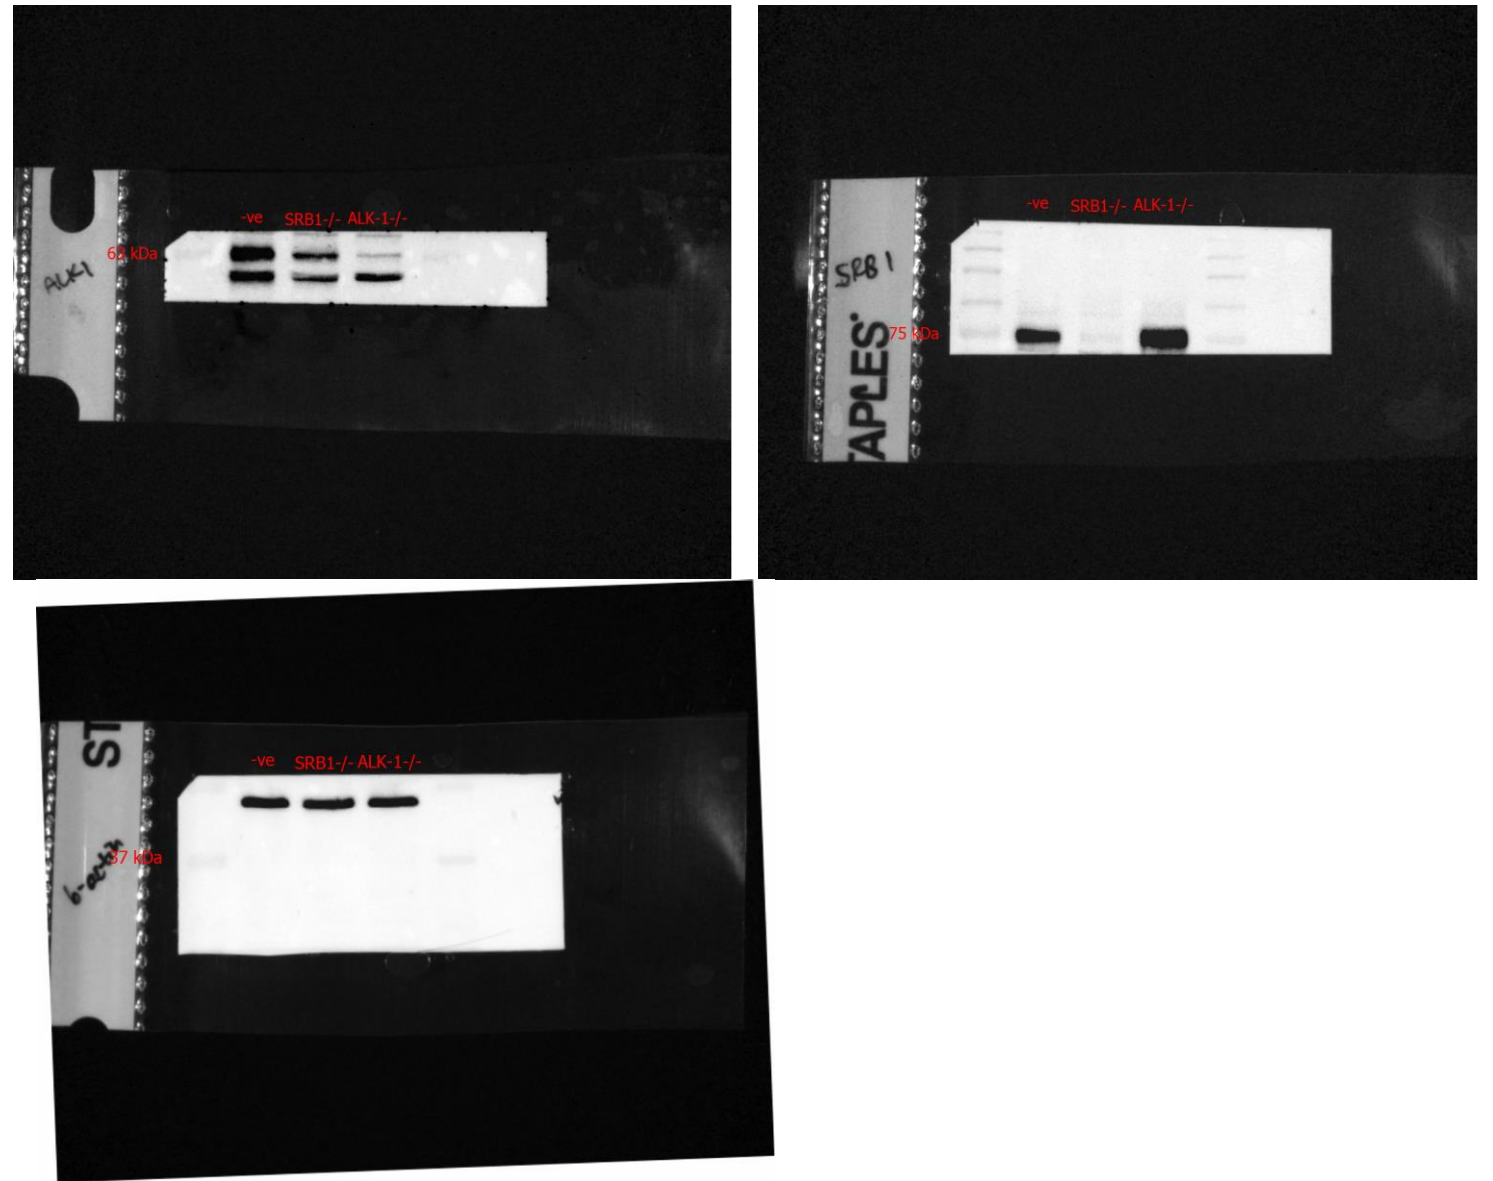

Figure 5F

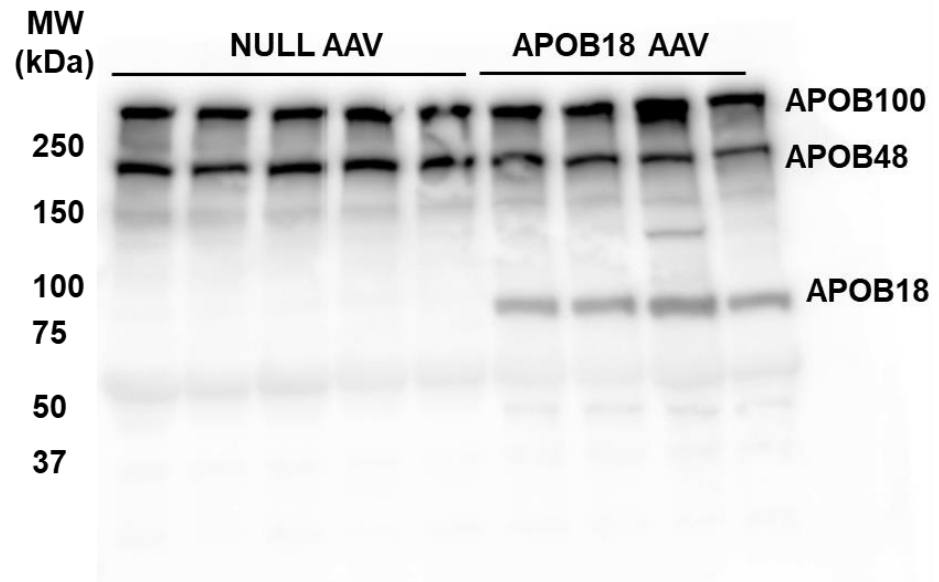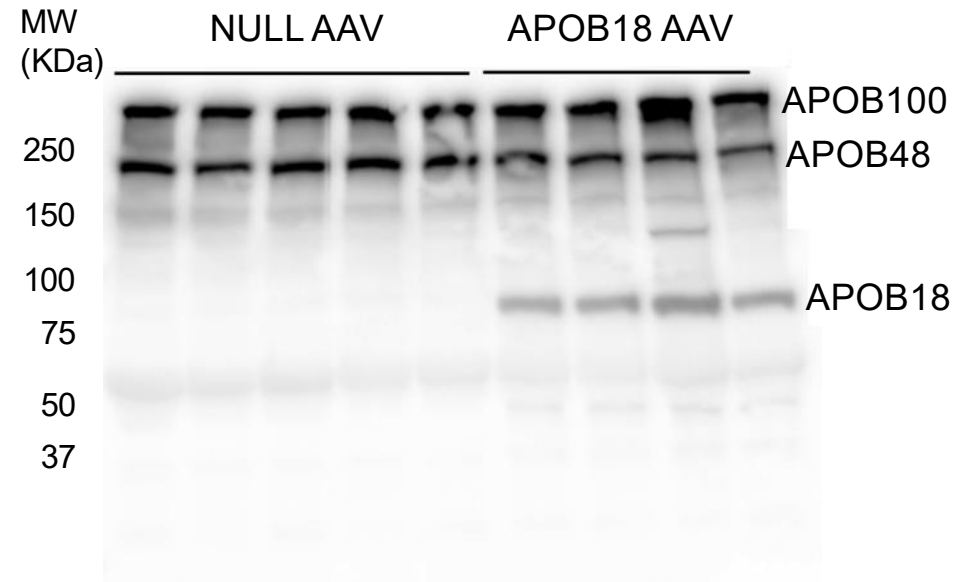

Figure S3B

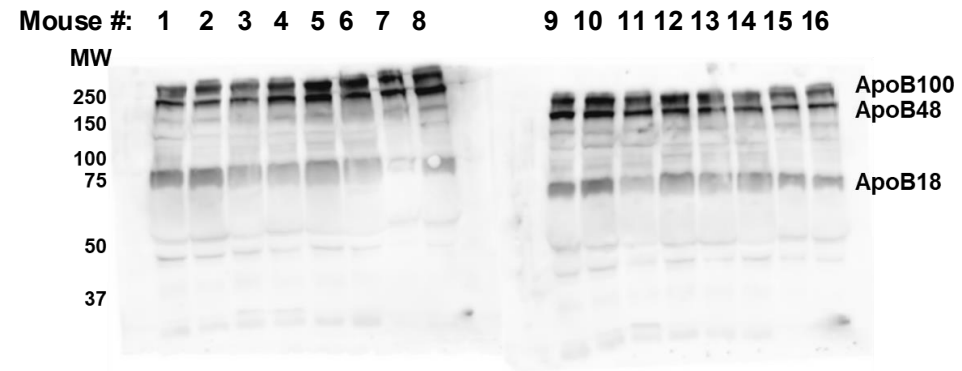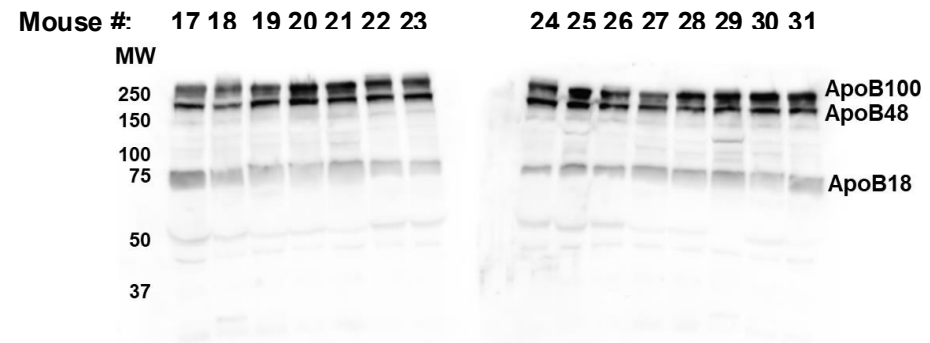

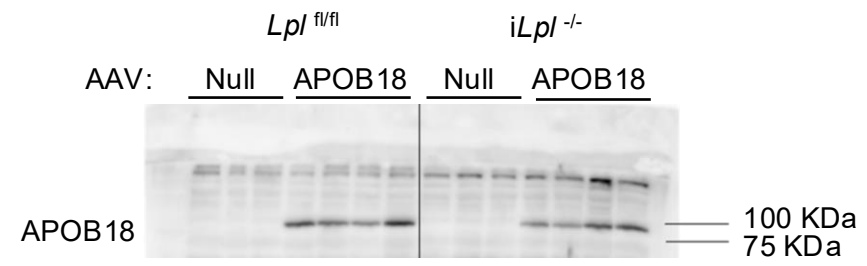

Supplement: sd2 [file 2]
